# Supplementary material for: Neuroprotective effects of TRPA1 channels in the cerebral endothelium following ischemic stroke
Source: eLife. 2018 Sep 21;7:e35316. doi: 10.7554/eLife.35316 (PMC6177258; doi:10.7554/eLife.35316)
Supplement: Figure 1—source data 1. [file elife-35316-fig1-data1.xlsx]

## Sheet: Vehicle vs 4HNE
	Frequency (Hz)			Site Frequency			Sites per Cell
	Vehicle	4-HNE		Vehicle	4-HNE		Vehicle	4-HNE
	0.16569	0.426		0.05523	0.0947		0.0743863	0.0247954
	0.15975	0.2367		0.05325	0.1065		0.0743863	0.0495909
	0.15975	0.5333		0.05325	0.1172		0.0743863	0.123977
	0.16492	0.31192		0.04123	0.426		0.0991817	0.0743863
	0.04771	0.5523		0.04771	0.1184		0.0247954	0
	0.05512	0.38584		0.05512	0.096		0.0247954	0.0743863
	0.1124	0.38496		0.0562	0.104		0.0495909	0.148773
	0.05325	0		0.03172	0.1841		0.0247954	0.148773
	0.03172	0.37908		0.07662	0.0643		0.0495909	0
	0.15324	0.37275		0.0478133	0.0642		0.0743863	0.0743863
	0.10758	0.4457		0.0727733	0.1264		0.0743863	0.0991817
	0.05458	0.97432		0.0584833	0.0932		0.0743863	0.173568
	0.17545	0.82845		0.063225	0.0637		0.0991817	0.173568
	0	0.6201		0.1065	0.1392		0.0247954	0.148773
	0.05058	0.47925		0.05523	0.1381		0.0247954	0.148773
	0	0.55006		0.04931	0.1034		0.0247954	0.123977
	0.1065	0.68209		0.05325	0.0959		0.0247954	0.148773
	0.05523	0.7833			0.0917			0.223159
	0	0.27824			0.0756			0.0743863
	0	0.80478			0.2611			0.0991817
	0.04931	0.6804			0.0696			0.223159
	0	0.2338						0.148773
	0.05325	0.59686						0.123977
	0	0.48834
Mean	0.0731679	0.501189		0.0574656	0.125395		0.0539665	0.114275
SEM	0.0127711	0.0454973		0.0039721	0.017976		0.00680225	0.0128301

## Sheet: 4-HNE vs 4-HNE+A967079
	Frequency (Hz)			Site Frequency			Sites per Cell
	4-HNE	4-HNE+A967079		4-HNE	4-HNE+A967079		4-HNE	4-HNE+A967079
	0.7306	0		0.13488	0.052		0.123977	0
	0.6804	0.052		0.09072	0.0552		0.223159	0.0495909
	0.45794	0.11046		0.114485	0.0787		0.0743863	0.0991817
	0.5523	0.27992		0.09205	0.0337		0.148773	0.0495909
	0.91256	0.06732		0.10736	0.1598		0.223159	0.0247954
	0.15384	0.15975		0.07692	0.0552		0.0495909	0.0247954
	0.6873	0		0.06873	0.033		0.247954	0.0743863
	1.08075	0.05523		0.074109	0.0181		0.347136	0.0247954
	0.6648	0.09903		0.1108	0.23		0.148773	0
	0.70538	0.01805		0.100769	0.0533		0.173568	0.0247954
	0.10256	0		0.05128	0.0513		0.0495909	0
	0.37282	0		0.18641	0.0533		0.0495909	0
	0.35896	0		0.15642	0.0513		0.0743863	0
	0.62568	0		0.083493	0		0.0991817	0
	0.25048	0		0.053171	0		0.0743863	0
	0.42537	0		0.082845	0		0.198363	0.0247954
	0.38661	0.23		0.09468	0		0.0743863	0.0743863
	0.75744	0		0.138453	0		0.198363	0.0495909
	0.41536	0.10256		0.052187	0		0.0743863	0
	0.35226	0		0	0		0.0743863	0
Mean	0.53367	0.058716		0.0934881	0.046245		0.136375	0.0260352
SEM	0.0572947	0.0185645		0.00927024	0.0129932		0.0183888	0.00684391
