# Supplementary material for: Neuroprotective effects of TRPA1 channels in the cerebral endothelium following ischemic stroke
Source: eLife. 2018 Sep 21;7:e35316. doi: 10.7554/eLife.35316 (PMC6177258; doi:10.7554/eLife.35316)
Supplement: Figure 2—source data 1. [file elife-35316-fig2-data1.xlsx]

## Sheet: Ca Transients
	Ca2+ transients frequency (Hz)				Sites per cell				Site frequency (Hz)
	Vehicle	4-HNE	4-HNE + A967079		Vehicle	4-HNE	4-HNE + A967079		Vehicle	4-HNE	4-HNE + A967079
	0.44505	1.62976	1.6248		0.173568	0.396727	0.396727		0.0636	0.1019	0.1016
	0.79875	1.491	1.06766		0.223159	0.322341	0.297545		0.0888	0.1147	0.089
	0.426	0.90525	1.15983		0.123977	0.173568	0.27275		0.0852	0.1293	0.1013
	0.5523	2.55458	0.49707		0.198363	0.694272	0.123977		0.069	0.0912	0.0994
	0.22865	2.59581	0.65904		0.0991817	0.446318	0.27275		0.0572	0.1411	0.0599
	1.17936	3.85246	1.18344		0.371932	0.644681	0.297545		0.0756	0.1461	0.0986
	0.448	2.09874	0.66672		0.198363	0.371932	0.173568		0.056	0.1399	0.0952
	0.37206	3.24825	1.04937		0.198363	0.570295	0.297545		0.0465	0.1459	0.0921
	0.5376	1.491	0.89641		0.247954	0.371932	0.297545		0.0538	0.0959	0.0747
	0.63162	1.99584	0.75306		0.297545	0.421522	0.173568		0.0526	0.1174	0.1076
	1.3079	2.20896	1.328		0.347136	0.421522	0.446318		0.0934	0.1299	0.0738
	0.7671	3.49181	1.49121		0.198363	0.793454	0.297545		0.0959	0.1104	0.1243
	1.0714	1.42424	0.79046		0.247954	0.694272	0.223159		0.1071	0.0736	0.0878
	0.76211	2.916	1.21284		0.322341	0.570295	0.322341		0.0586	0.1268	0.0898
	0.80868	2.478	0.83728		0.27275	0.694272	0.223159		0.0735	0.0885	0.093
	1.224	1.33137	1.57963		0.471113	0.247954	0.396727		0.0644	0.1331	0.1021
	1.05989	3.20515	0.89641		0.471113	0.619886	0.173568		0.0558	0.1302	0.1281
	0.46512	2.82225	0.99414		0.27275	0.446318	0.198363		0.0423	0.1394	0.1312
	0.93891	3.9405	2.25628		0.198363	0.619886	0.5455		0.1174	0.1576	0.1026
	1.16676	3.0589	1.40616		0.27275	0.669477	0.347136		0.0898	0.1133	0.1132
	0.716	1.2665	1.917		0.27275	0.27275	0.347136		0.065091	0.1185	0.136929
	0.26313	2.01375	0.68144		0.123977	0.59509	0.173568		0.052626	0.0839	0.108206
	0.67977	1.71213	1.04937		0.371932	0.446318	0.27275		0.045318	0.0951	0.0953973
	0.2264	1.7127	0.93891		0.123977	0.322341	0.27275		0.04528	0.1317	0.0855255
	0.27168	0.79725	1.13568		0.0991817	0.27275	0.396727		0.065085	0.0725	0.07098
Mean	0.69393	2.24969	1.12289		0.247954	0.484007	0.289611		0.068796	0.117116	0.0984935
SEM	0.0669068	0.179062	0.0831913		0.0207947	0.0339411	0.0196662		0.00409172	0.00477064	0.00376238
