# Supplementary material for: Neuroprotective effects of TRPA1 channels in the cerebral endothelium following ischemic stroke
Source: eLife. 2018 Sep 21;7:e35316. doi: 10.7554/eLife.35316 (PMC6177258; doi:10.7554/eLife.35316)
Supplement: Figure 3—source data 1. [file elife-35316-fig3-data1.xlsx]

## Sheet: 4-HNE Fluorescence
	Fold Increase in 4-HNE Fluorescence
	Normoxia	Hypoxia
	1.10659	6.31552
	3.52899	3.27234
	0.240613	3.12568
	0.367565	0.926476
	0.219645	0.927621
	0.676925	1.44345
	0.901497	4.49832
	0.636594	1.52388
	0.672342	4.31958
	1.64923
Mean	1	2.9281
SEM	0.312121	0.626037

## Sheet: Normoxia vs Hypoxia sparklets
	Frequency (Hz)				Site Frequency (Hz)				Sites per Cell
	Normoxia	Hypoxia	Hypoxia+A967079		Normoxia	Hypoxia	Hypoxia+A967079		Normoxia	Hypoxia	Hypoxia+A967079
	0.05469	0.21876	0.20196		0.0547	0.1367	0.0391		0.0247954	0.0743863	0.0991817
	0	0.1181	0.0666		0.0508	0.0236	0.0828		0	0.123977	0.0743863
	0	0.27345	0.0325		0.0463	0.0655	0.0519		0	0.0743863	0.0247954
	0	0.1181	0.04331		0.0493	0.1026	0.054		0.0247954	0.0495909	0.0247954
	0	0.32752	0.12378		0.0469	0.046	0.1105		0	0.123977	0.0743863
	0.05078	0.20512	0.2564		0.0558	0.0611	0.0505		0	0.123977	0.0495909
	0	0.22992	0		0.0318	0.0921	0.0222		0	0.0495909	0
	0.04633	0.2442	0		0.0533	0.1657	0.0325		0	0.123977	0
	0.04931	0.27615	0		0.0354	0.0747	0.0433		0.0247954	0.0991817	0
	0	0.33138	0.05534		0.0544	0.14	0.0413		0	0.0743863	0
	0.18775	0.29864	0.05138		0.0961	0.1215	0.1282		0.0247954	0.0495909	0
	0.2391	0.28	0		0.0867	0.089	0.0553		0.0247954	0.0991817	0.0247954
	0.0635	0.60746	0.15414		0.0698	0.068	0.0514		0	0.0495909	0.0247954
	0	0.6228	0.05138		0.0479	0.0845	0.0771		0.0991817	0.123977	0.0495909
	0.213	0.58968	0.05327		0	0.0743	0.0514		0.123977	0.173568	0.0247954
	0.03543	0.54241	0.208		0	0.0799	0.0533		0.0495909	0.198363	0.0247954
	0.10874	0.924	0		0	0.0875	0.052		0.0991817	0.173568	0.0991817
	0.3843	0.852	0		0	0.09	0.0402		0.0247954	0.322341	0
	0.26	0.6123	0		0	0.088	0.0452		0.0495909	0.297545	0
	0.20932	1.03992	0			0.0822	0.0552		0.0991817	0.173568	0
	0.14368	0.38507	0			0.0789	0		0.0743863	0.27275	0
	0	0.73965	0.04023			0.0649	0		0.0743863	0.123977	0
	0	0.2367	0			0.0496	0		0.0743863	0.223159	0.0247954
	0	0.1948	0.04519				0		0	0.0743863	0
	0	0.34716	0.05523				0		0	0.0743863	0.0247954
		0.36774	0				0			0.173568	0.0247954
		0.1712	0.03914				0			0	0.0247954
		0.17615	0.16569							0	0.0495909
			0								0.0495909
			0								0.0247954
			0.05192								0
			0								0.0247954
			0.05395								0.0247954
Mean	0.0818372	0.404656	0.0530124		0.0410105	0.0854913	0.0421259		0.0357054	0.125748	0.0262982
SEM	0.0215004	0.0477175	0.0121536		0.00672952	0.00665852	0.00642102		0.0079809	0.0155638	0.00493784
