# Supplementary material for: Neuroprotective effects of TRPA1 channels in the cerebral endothelium following ischemic stroke
Source: eLife. 2018 Sep 21;7:e35316. doi: 10.7554/eLife.35316 (PMC6177258; doi:10.7554/eLife.35316)
Supplement: Figure 4—source data 1. [file elife-35316-fig4-data1.xlsx]

## Sheet: DHE Fluorescence
		ΔFluorescence (%)
	Time (minutes)	Normoxia						Hypoxia								Hypoxia+PEG-SOD								Hypoxia+mitoTEMPO
	0	0	0	0	0	0		0	0	0	0	0	0	0		0	0	0	0	0	0	0		0	0	0	0	0	-10.209
	1	4.02425	5.36207	4.70018	-0.425085	-16.9055		12.3112	16.1718	10.0761	21.231	4.88818	21.6677	15.4546		-2.59554	0.313266	0.423773	-2.98483	6.14895	-1.94694	12.7997		-39.683	3.6528	-3.8573	-0.6128	-0.5144	-5.0162
	2	11.893	3.19402	8.32803	-2.83004	-15.7944		11.3256	19.9921	26.2336	24.786	3.53981	25.0065	23.7597		-4.52323	0.453404	3.54664	-2.36119	10.8701	2.92117	20.4337		-51.314	7.0385	-10.768	-1.8726	2.4898	-3.0785
	3	0.352014	-0.239173	16.9913	-3.21458	-22.4717		16.73	24.8113	33.858	27.905	9.12635	41.3735	22.2794		-13.6719	2.19404		-1.20941	16.8413	-1.44943	25.4636		-63.999	15.455	-14.388	-3.6056	0.9966	2.0144
	4	8.16524	-2.28248	24.2629	-6.6429	-18.8379		23.9793	31.087	33.1679	30.588	4.4899	44.6764	83.9971		-28.6235	4.86047	21.569	-1.249	21.3937	-1.80836	32.7547		-62.147	23.622	-19.317	-7.3742	-0.8472	6.0256
	5	6.75698	-4.16326	17.3015	-8.97465	-18.7713		25.8274	33.6148	31.1356	32.763	8.42261	48.1802	94.1323		-32.0255	4.72855	28.9154	-1.18342	26.671	0.414293	32.4004		-64.774	30.111	-21.384	-7.4146	-14.343	5.971
	6	8.0107	-6.61344	24.316	-4.41019	-19.838		29.0576	42.868	31.0717	33.566	5.48733	34.7904	104.604		-43.3124	7.92925	32.6765	1.14521	29.1526	-2.68495	34.315		-67.303	36.505	-32.888	-12.557	-7.9465	7.3365
	7	10.2337	-9.26293	24.7079	-5.89116	-21.2275		41.5412	44.9014	34.3285	31.09	8.90689	42.5548	119.429		-44.5337	7.42916	33.6181	-3.03355	23.4868	-2.61565	32.943		-62.433	39.796	-38.337	-18.446	-11.781	8.754
	8	12.2018	-10.5546	28.69	-4.31021	-18.9785		43.2724	52.8186	47.2178	35.022	6.93573	43.7773	90.722		-45.2133	6.30358	39.164	-2.80494	28.0519	-7.60689	30.0094		-65.189	48.923	-41.793	-19.449	-12.994	9.6584
	9	14.8768	-13.2173	34.8657	-8.66466	-18.1056		38.689	53.3135	42.1146	34.483	7.94297	43.3849	23.7633		-43.7261	8.40698	38.4508	-6.08333	28.5103	-10.3567	34.0517		-67.614	49.279	-48.047	-22.359	-22.539	9.1984
	10	16.8401	-15.2786	34.6258	-2.57484	-18.4137		42.2261	58.3058	35.1538	33.579	7.31986	39.1808	21.9489		-44.4404	7.12273	44.3798	-3.98717	31.2128	-16.026	32.9977		-68.651	50.268	-50.31	-22.057	-21.536	12.2
		Normoxia		Hypoxia		Hypoxia+PEG-SOD		Hypoxia+mitoTEMPO
		Mean	SEM	Mean	SEM	Mean	SEM	Mean	SEM
	0	0	0	0	0	0	0	-1.7015	1.7015
	1	-0.648808	4.18873	14.391	2.68424	1.73691	2.18348	-7.67182	6.5208
	2	0.958133	4.86767	18.4806	3.73792	4.47722	3.24671	-9.58413	8.69227
	3	-1.71643	6.28276	25.634	4.73632	4.69471	5.7593	-10.5878	11.383
	4	0.932969	7.26364	27.9981	5.44649	6.98529	7.71823	-10.0063	11.95
	5	-1.57015	6.25664	29.9906	5.27732	8.56011	8.63804	-11.9723	12.9047
	6	0.29302	7.45569	29.4735	5.17202	8.46018	10.3986	-12.8088	14.4155
	7	-0.28801	8.01843	33.8871	5.43771	6.7563	10.3533	-13.7412	14.5763
	8	1.40971	8.52122	38.174	6.68184	6.84338	10.9579	-13.4739	16.2694
	9	1.95098	9.98873	36.6547	6.28713	7.03622	11.1603	-17.0136	16.9945
	10	3.03977	10.0386	35.9609	6.77139	7.32278	11.9081	-16.681	17.5124

## Sheet: Hypoxia vs Hypoxia+PegSOD
	Frequency (Hz)			Sites per Cell (Hz)
	Hypoxia	Hypoxia+PEG-SOD		Hypoxia	Hypoxia+PEG-SOD
	0.05523	0		0.0991817	0
	0.16185	0		0.198363	0
	0.05	0.16869		0.0495909	0.0495909
	0.15384	0		0.0495909	0
	0.5523	0.11024		0.223159	0.0247954
	0.27505	0		0.123977	0
	0.39494	0.08678		0.223159	0.0247954
	0.16569	0.16407		0.0991817	0.0743863
	0.24655	0.10078		0.173568	0.0495909
	0.16569	0.05128		0.198363	0.0247954
	0.91692	0.11046		0.173568	0.0495909
	0.19568	0.10078		0.173568	0.0495909
	0.93891	0.26365		0.148773	0.0743863
	0.1065	0.04752		0.0991817	0.0247954
	0.1744	0		0.322341	0
	0.26222	0		0.198363	0
	0.34812	0		0.223159	0
	0.30135	0		0.223159	0
	0.2268	0.05523		0.198363	0.0247954
	0.04734	0.07906		0.0743863	0.0247954
	0.66276	0.16569		0.173568	0.0495909
	0.918	0.05523		0.198363	0.0247954
	0.8463	0		0.123977	0
	0.594	0.09072		0.123977	0.0495909
	0.8397	0		0.223159	0
	0.44184	0		0.173568	0
	0.27224	0.03552		0.173568	0.0247954
	1.08759	0		0.247954	0
	0.82845	0.05523		0.223159	0.0247954
	0.74766	0		0.198363	0
Mean	0.432597	0.058031		0.171089	0.0223159
SEM	0.0585651	0.0123777		0.0113003	0.00434378

## Sheet: Hypoxia vs Hypoxia+mitoTEMPO
	Frequency (Hz)			Sites per Cell (Hz)
	Hypoxia	Hypoxia+mitoTEMPO		Hypoxia	Hypoxia+mitoTEMPO
	0.77014	0		0.148773	0
	0.9862	0.09219		0.247954	0.0743863
	0.3945	0.05512		0.148773	0.0247954
	0.1948	0.0466		0.0743863	0.0247954
	0.4734	0		0.198363	0
	0.20772	0.14727		0.0743863	0.0743863
	0.82208	0.04104		0.223159	0.0247954
	0.14416	0.03977		0.0991817	0.0247954
	0.213	0		0.0991817	0
	0.65085	0		0.198363	0
	0.37723	0.03654		0.123977	0.0247954
	0.54241	0		0.123977	0
	0.30768	0		0.0991817	0
	0.11956	0		0.0495909	0
	0.19764	0		0.0495909	0
	0.29412	0		0.0495909	0
	1.04346	0		0.322341	0
	0.15975	0		0.0743863	0
	0.56408	0.04931		0.198363	0.0247954
	0.2051	0		0.0991817	0
	0	0		0	0
	0	0		0	0
	0	0.09862		0	0
	0	0.11262		0	0.0247954
	0	0		0	0.0495909
Mean	0.346715	0.0287632		0.108108	0.0148773
SEM	0.0623491	0.00857865		0.0172906	0.00452701
