# Supplementary material for: Neuroprotective effects of TRPA1 channels in the cerebral endothelium following ischemic stroke
Source: eLife. 2018 Sep 21;7:e35316. doi: 10.7554/eLife.35316 (PMC6177258; doi:10.7554/eLife.35316)
Supplement: Figure 5—source data 1. [file elife-35316-fig5-data1.xlsx]

## Sheet: Vasodilation (%)
	Vasodilation (%)			Vasodilation (%)			Vasodilation (%)
	Endothelium Intact	Endothelium Denuded		Hypoxia	Hypoxia+Tempol		Hypoxia	Hypoxia+mitoTEMPO
	15.41	6.61479		5.549	2.726		16.9854	2.71585
	19.79	2.61384		12.34	2.187		20.3009	6.74022
	20.3009	3.62899		3.981	2.056		8.7923	0.50874
	7.59	0.613194		21.85	6.394		9.46594	3.66237
	22.31	2.1779		15.9	4.585		7.384	6.763
							22.14	7.964
Mean	17.0802	3.12974		11.924	3.5896		14.1781	4.7257
SEM	2.62603	0.997496		3.30332	0.834281		2.62128	1.17825
