# Supplementary material for: Neuroprotective effects of TRPA1 channels in the cerebral endothelium following ischemic stroke
Source: eLife. 2018 Sep 21;7:e35316. doi: 10.7554/eLife.35316 (PMC6177258; doi:10.7554/eLife.35316)
Supplement: Figure 6—source data 1. [file elife-35316-fig6-data1.xlsx]

## Sheet: Vasodilation (%)
	Vasodilation (%)			Vasodilation (%)			Vasodilation (%)
	Hypoxia	Hypoxia+A967079		Hypoxia TRPA1fl/fl	Hypoxia eTRPA1-/-		Hypoxia	Hypoxia+TRAM34+Apamin
	42.97	13.98		21.93	8.946		10.9303	3.053
	43.47	17.1		12.97	10.37		19.1448	4.33395
	30.16	10.58		13.53	7.448		46.5082	11.9867
	24.58	12.89		15.88	-0.18		8.30497	-2.65487
	12.32	5.11		8.845	7.007		12.32	1.01243
				20.25	9.13339
				15.41
Mean	30.7	11.932		15.545	7.12073		19.4417	3.54623
SEM	5.87025	2.00235		1.68054	1.5423		6.99955	2.41845
