# Supplementary material for: Neuroprotective effects of TRPA1 channels in the cerebral endothelium following ischemic stroke
Source: eLife. 2018 Sep 21;7:e35316. doi: 10.7554/eLife.35316 (PMC6177258; doi:10.7554/eLife.35316)
Supplement: Figure 7—source data 1. [file elife-35316-fig7-data1.xlsx]

## Sheet: Vasodilation (%)
	Vasodilation (%)			Vasodilation (%)
	4-HNE	4-HNE+A967079		Hypoxia	Hypoxia+A967079
	31.451	13.369		29.7131	13.6066
	11.187	0.748		19.4012	10.1089
	32.907	13.896		22.9257	8.16952
	25.542	9.2509		12.8351	5.22788
	22.712	7.5452		9.45187	1.41391
				18.8123	5.54796
Mean	24.7598	8.96182		18.8566	7.34578
SEM	3.87411	2.38041		2.94068	1.73604
