# Supplementary material for: Neuroprotective effects of TRPA1 channels in the cerebral endothelium following ischemic stroke
Source: eLife. 2018 Sep 21;7:e35316. doi: 10.7554/eLife.35316 (PMC6177258; doi:10.7554/eLife.35316)
Supplement: Figure 8—source data 1. [file elife-35316-fig8-data1.xlsx]

## Sheet: Hemisphere Infarcted (%)
		Hemisphere Infarcted (%)			Hemisphere Infarcted (%)			Hemisphere Infarcted (%)
		TRPA1fl/fl	eTRPA1-/-		Vehicle	CinA		TRPA1fl/fl+CinA	eTRPA1-/-+CinA
		26.39	66.62		40.7812	22.06		46.6334	51.74
		55.38	69.55		38.6163	26.2		30.4036	51.77
		60.79	66.59		39.404	27.19		42.3905	49.34
		28.63	54.42		50.946	49.9		36.8005	62.03
		52.57	52.12		61.1576	46.69		27.2665	43.99
					64.9			47.3904
	Mean	44.752	61.86		49.3009	34.408		38.4808	51.774
	SEM	7.17069	3.56643		4.73044	5.75671		3.43975	2.93003
